# Supplementary material
Source: Elsevier journal article supplement (https://www.sciencedirect.com/science/article/pii/S1699258X20301327)

Supplementary material

Figure S1. Results of the sensitivity analysis according to different ACR response values obtained by Nash P. et al. (10)

A) ACR 20

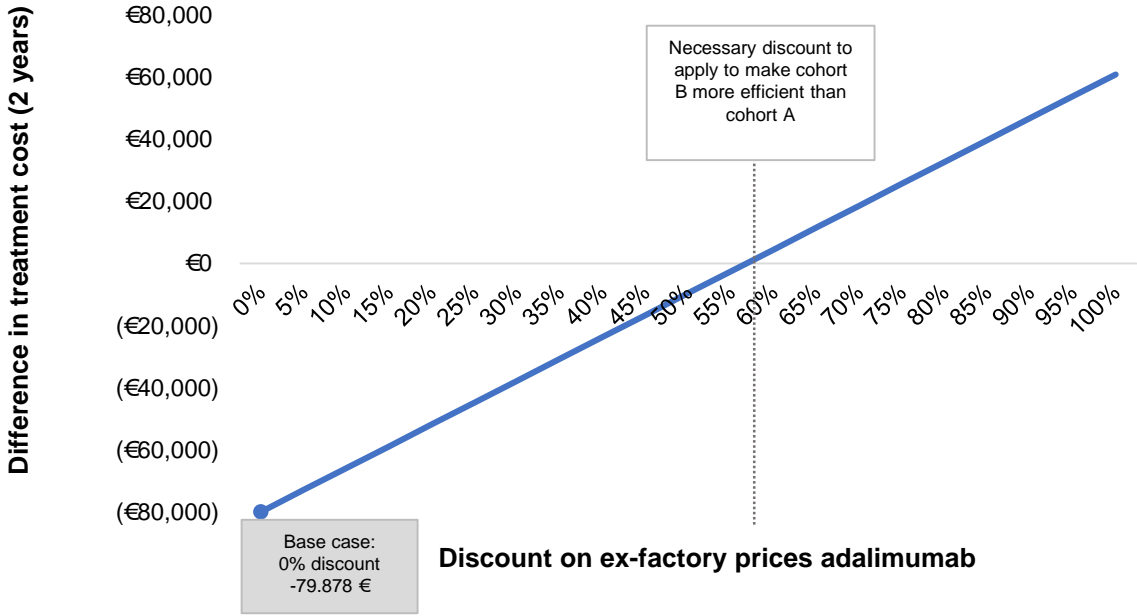

B) ACR 50

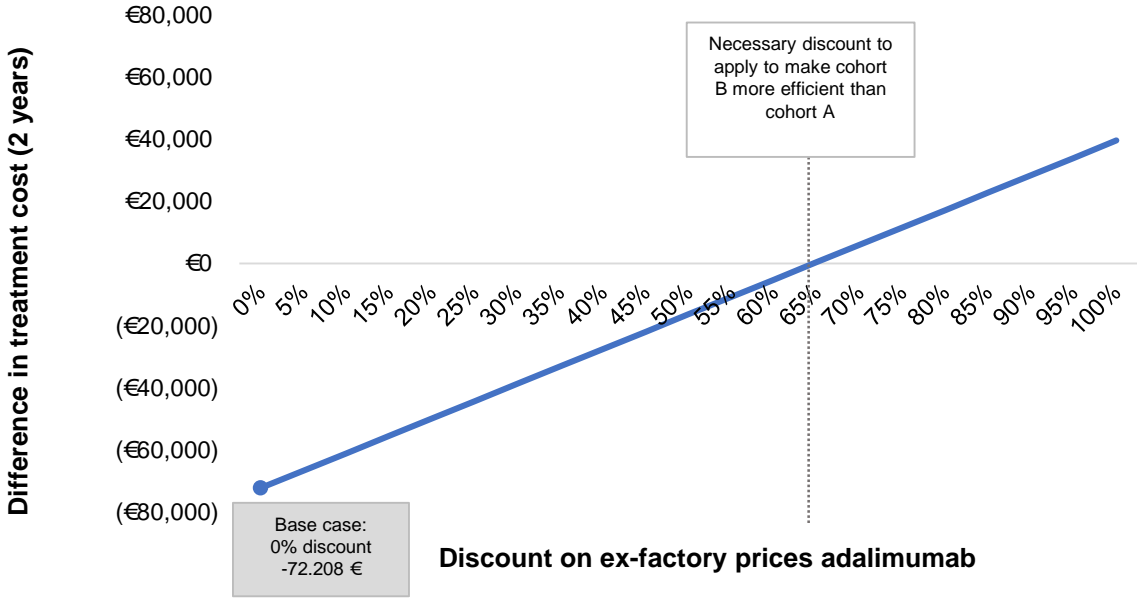

# Supplementary material

## Figure S1. Results of the sensitivity analysis according to different ACR response values obtained by Nash P. et al. (10)

### C) ACR 70

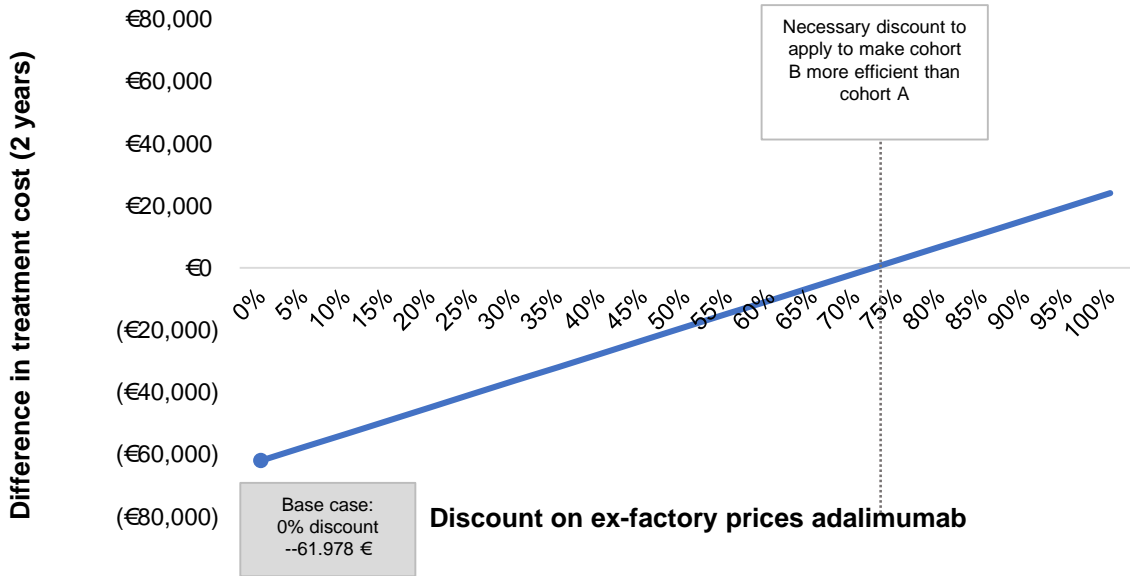

Supplementary material

Figure S2. Results of the sensitivity analysis according to different ACR response values obtained by Strand V. et al. (11)

A) ACR 20

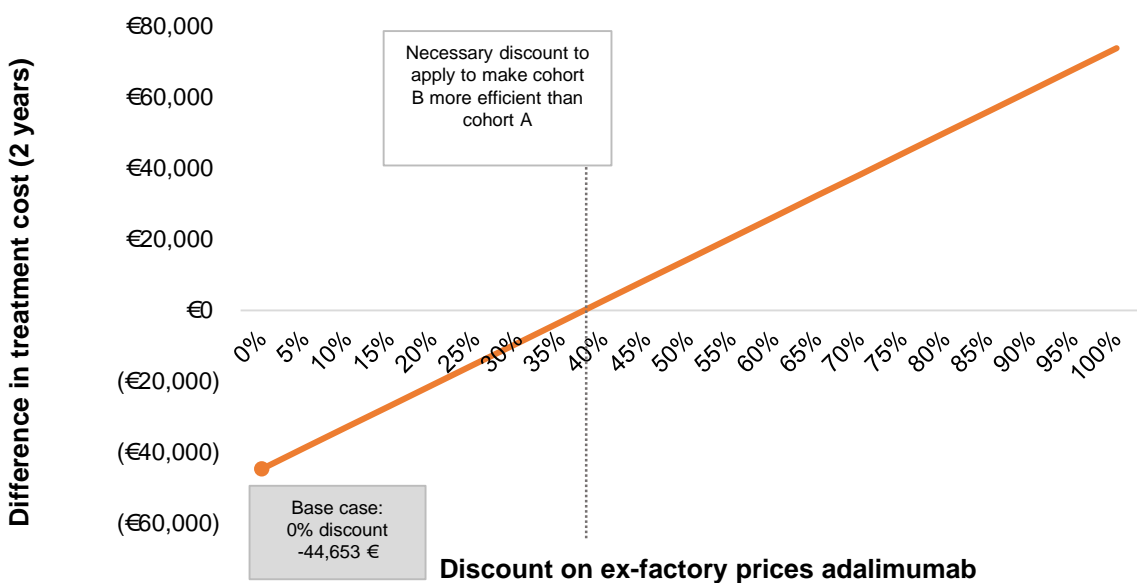

B) ACR 50

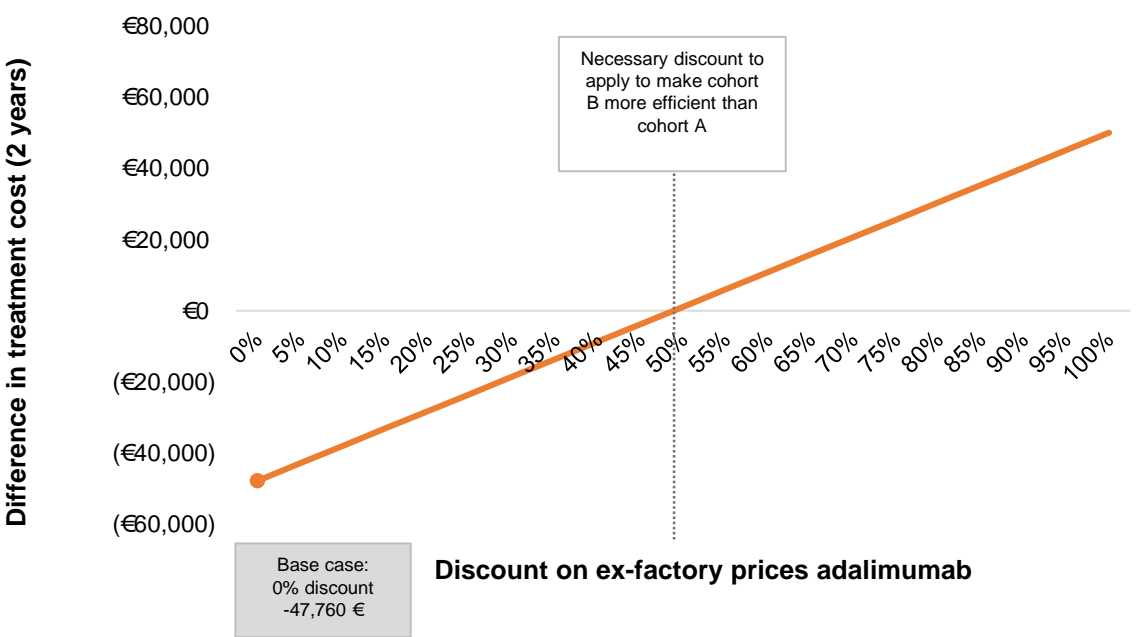

# Supplementary material

## Figure S2. Results of the sensitivity analysis according to different ACR response values obtained by Strand V. et al. (11)

### C) ACR 70

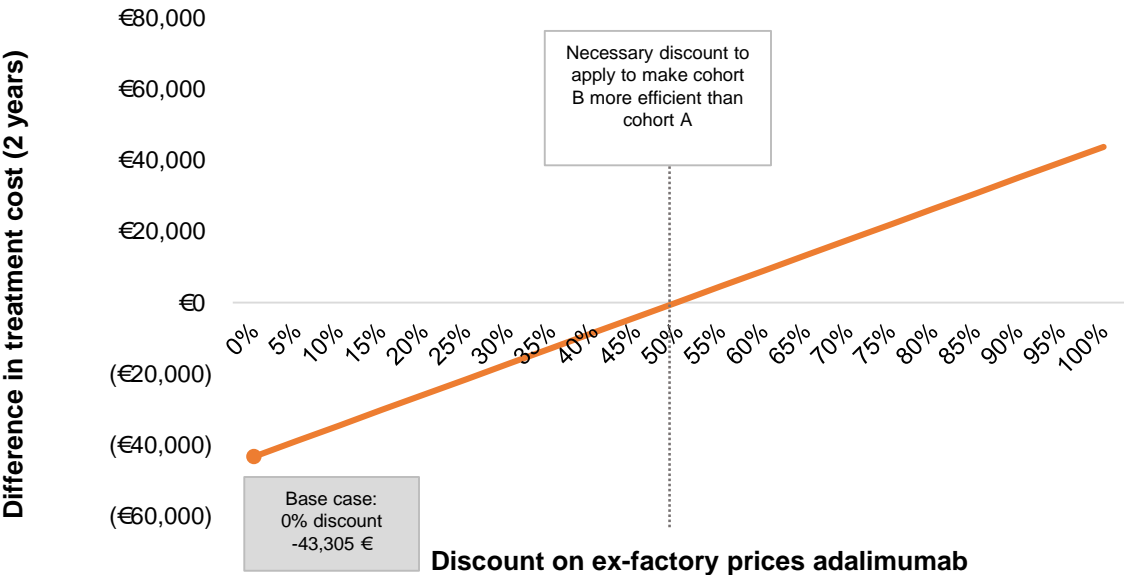

Supplement: mmc1 [file S1699258X20301327:mmc1.pdf]
